# Supplementary material for: Domain-swapped cytochrome cb 562 dimer and its nanocage encapsulating a Zn–SO4 cluster in the internal cavity
Source: PubMed Central journal article supplement (PMC5519777; doi:10.1039/c5sc02428e), 2015-09-22
Supplement: SC-006-C5SC02428E-s001.pdf [file SC-006-C5SC02428E-s001.pdf]

## Electronic Supplementary Information

### Domain-swapped Cytochrome *cb*<sub>562</sub> Dimer and Its Nanocage Encapsulating a Zn-SO<sub>4</sub> Cluster in the Internal Cavity

Takaaki Miyamoto,<sup>a</sup> Mai Kuribayashi,<sup>a</sup> Satoshi Nagao,<sup>a</sup> Yasuhito Shomura,<sup>b</sup> Yoshiki Higuchi,<sup>cd</sup> and Shun Hirota\*<sup>a</sup>

<sup>a</sup> Graduate School of Materials Science, Nara Institute of Science and Technology, 8916-5 Takayama, Ikoma, Nara 630-0192, Japan

<sup>b</sup> Graduate School of Science and Engineering, Ibaraki University, 4-12-1, Nakanarusawa, Hitachi, Ibaraki 316-8511, Japan

<sup>c</sup> Department of Life Science, Graduate School of Life Science, University of Hyogo, 3-2-1 Koto, Kamigori-cho, Ako-gun, Hyogo 678-1297, Japan

<sup>d</sup> RIKEN SPring-8 Center, 1-1-1 Koto, Sayo-cho, Sayo-gun, Hyogo 679-5148, Japan

### Contents

|                                           |                                                                                                                                                                                   |          |
|-------------------------------------------|-----------------------------------------------------------------------------------------------------------------------------------------------------------------------------------|----------|
| <b>1. Experimental section</b>            |                                                                                                                                                                                   | p. S2–S5 |
| <b>2. Supplementary figures and table</b> |                                                                                                                                                                                   |          |
| <b>Fig. S1</b>                            | Size exclusion chromatograms of oxidized <i>E. coli</i> cyt <i>b</i> <sub>562</sub> and cyt <i>cb</i> <sub>562</sub> .                                                            | p. S6    |
| <b>Fig. S2</b>                            | Size exclusion chromatograms of the solution containing dimeric cyt <i>b</i> <sub>562</sub> and dimeric cyt <i>cb</i> <sub>562</sub> .                                            | p. S7    |
| <b>Fig. S3</b>                            | Differential scanning calorimetry thermograms of dimeric cyt <i>cb</i> <sub>562</sub> .                                                                                           | p. S8    |
| <b>Fig. S4</b>                            | Overlapped view of the protein and active site structures of monomeric and dimeric cyt <i>cb</i> <sub>562</sub> .                                                                 | p. S9    |
| <b>Fig. S5</b>                            | $F_o - F_c$ omit map of the Zn <sup>2+</sup> ions in the internal cavity of the cage structure of dimeric cyt <i>cb</i> <sub>562</sub> .                                          | p. S10   |
| <b>Fig. S6</b>                            | Coordination structures of Zn <sup>2+</sup> and SO <sub>4</sub> <sup>2-</sup> ions in the internal cavity of the cage structure of dimeric cyt <i>cb</i> <sub>562</sub> .         | p. S11   |
| <b>Fig. S7</b>                            | Schematic views of the hydrogen bonds at the hinge loop for the protomers of dimeric cyt <i>cb</i> <sub>562</sub> and monomeric cyt <i>b</i> <sub>562</sub> .                     | p. S12   |
| <b>Fig. S8</b>                            | Comparison of Zn binding sites containing Ala1 and Asp39 between the domain-swapped cyt <i>cb</i> <sub>562</sub> dimer cage and cyt <i>cb</i> <sub>562</sub> surface mutant cage. | p. S13   |
| <b>Table S1</b>                           | Crystallographic statistics of data collection and structure refinement of dimeric cyt <i>cb</i> <sub>562</sub> .                                                                 | p. S14   |
| <b>3. Supplementary references</b>        |                                                                                                                                                                                   | p. S15   |

## 1. Experimental section

### Plasmids of *E. coli* cyt *b*<sub>562</sub> and cyt *cb*<sub>562</sub>

The *E. coli* cyt *b*<sub>562</sub> gene was synthesized (Life Technologies Japan, Tokyo) and sub-cloned into the *Nde*I-*Bam*HI site of the pET29b plasmid. Conversion of cyt *b*<sub>562</sub> to cyt *cb*<sub>562</sub> (R98C/Y101C cyt *b*<sub>562</sub> mutant) was based on reported method.<sup>1</sup> The cyt *cb*<sub>562</sub> gene was sub-cloned into the *Eco*RI-*Hind*III site of the pKK223-3 plasmid. DNA sequencing was carried out with a BigDye Terminator v3.1 cycle sequencing kit (Applied Biosystems, Inc., Foster City, CA) with an ABI PRISM 310 genetic analyzer sequencing system (Applied Biosystems, Inc.). The obtained plasmids of cyt *b*<sub>562</sub> and cyt *cb*<sub>562</sub> were introduced into competent cells of *E. coli* BL21 (DE3) (Novagen) and *E. coli* JCB387, respectively. Cyt *cb*<sub>562</sub> was co-expressed with the cyt *c* maturation (ccm) proteins by introducing the pEC86 plasmid into the *E. coli* JCB387 competent cells.<sup>2</sup>

### Purification of *E. coli* cyt *b*<sub>562</sub> and cyt *cb*<sub>562</sub>

*E. coli* BL21 (DE3) cells overproducing *E. coli* cyt *b*<sub>562</sub> were grown in LB broth at 37 °C. Isopropyl β-D-1-thiogalactopyranoside was added to the *E. coli* solution (final concentration, 0.25 mM) when the OD<sub>600</sub> value reached 0.4–0.5. The OD<sub>600</sub> value reached about 1.6 when culturing the *E. coli* solution at 37 °C for 3 h. The cells were harvested by centrifugation, and subsequently suspended in a minimal volume of 50 mM potassium phosphate buffer, pH 7.0. Cyt *b*<sub>562</sub> was extracted from the cells by freeze-thawing. After estimating the amount of cyt *b*<sub>562</sub> from the absorbance at 280 nm, more than 1 equivalent (against cyt *b*<sub>562</sub>) of hemin in 1 M NaOH was added to the solution. To remove the extra hemin, the protein solution was centrifuged and the obtained supernatant was passed through an anion exchange column with DE52 (Whatman). The protein solution was dialyzed overnight in 10 mM potassium phosphate buffer, pH 4.8. Cyt *b*<sub>562</sub> was purified by cation exchange chromatography with CM52 (Whatman) and gel filtration chromatography (Hiload 26/60 Superdex 75, GE Healthcare, Buckinghamshire) using a FPLC system (BioLogic DuoFlow 10, Bio-Rad, CA) (flow rate, 0.8 mL/min; monitoring wavelength, 418 nm; solvent, 50 mM potassium phosphate buffer, pH 7.0; temperature, 4 °C). Cyt *b*<sub>562</sub> was oxidized by an addition of ten equivalents of potassium ferricyanide, and the ferricyanide ion was removed from the cyt *b*<sub>562</sub> solution with the DE52 column (Whatman). The purity of cyt *b*<sub>562</sub> was confirmed by the ratio of the absorbance at 418 nm to that at 280 nm (Abs<sub>418</sub>/Abs<sub>280</sub> > 6). The concentration of cyt *b*<sub>562</sub> was adjusted by the intensity of its Soret band using the molar extinction coefficient for cyt *b*<sub>562</sub> reported previously ( $\epsilon_{418} = 117.4 \text{ mM}^{-1}\text{cm}^{-1}$ ).<sup>3</sup>

For cyt *cb*<sub>562</sub>, *E. coli* JCB387 cells overexpressing cyt *cb*<sub>562</sub> were cultured in LB broth at 37 °C for 16 h until the OD<sub>600</sub> value reached about 2.0. The cells were harvested by centrifugation, and subsequently suspended in a minimum volume of 50 mM potassium

phosphate buffer, pH 7.0. The pellets were suspended in spheroplasting buffer (10 mM Tris-HCl buffer, pH 8.0, containing 10 mM EDTA and 20% (w/v) sucrose) at 4 °C. After the obtained solution was incubated at 4 °C for 10 min, the precipitate was collected by centrifugation. Cold pure water was added to the pellet containing cyt *cb*<sub>562</sub>. The obtained cyt *cb*<sub>562</sub> solution was mixed on ice, and subsequently centrifuged. After the buffer of the supernatant was exchanged by dialysis to 25 mM sodium acetate buffer, pH 5.0, cyt *cb*<sub>562</sub> was purified by cation exchange chromatography with CM52 (Whatman). The buffer of the cyt *cb*<sub>562</sub> solution was exchanged by dialysis to 10 mM Tris-HCl buffer, pH 8.0, and cyt *cb*<sub>562</sub> was purified by anion exchange chromatography (UNO-Q, Bio-Rad) and subsequently by gel filtration chromatography (HiLoad 26/60 Superdex 75, GE Healthcare) using the FPLC system (BioLogic DuoFlow 10, Bio-Rad) (flow rate, 1.0 mL/min; monitoring wavelength, 415 nm; solvent, 10 mM Tris-HCl buffer, pH 8.0 (for anion exchange chromatography) and 50 mM potassium phosphate buffer, pH 7.0 (for gel filtration chromatography); temperature, 4 °C). Cyt *cb*<sub>562</sub> was oxidized by the same procedures as cyt *b*<sub>562</sub>. The purity of cyt *cb*<sub>562</sub> was confirmed by the ratio of the absorbance at 415 nm to that at 280 nm ( $Abs_{415}/Abs_{280} > 8$ ). Molar extinction coefficients of oxidized monomeric and dimeric cyt *cb*<sub>562</sub> were determined by the hemochrome method as  $\epsilon_{415} = 136 \pm 1$  and  $\epsilon_{415} = 133 \pm 1$  mM<sup>-1</sup>cm<sup>-1</sup>, respectively.<sup>4</sup> The concentration of cyt *cb*<sub>562</sub> was adjusted by the intensity of its Soret band.

#### **Preparation of dimeric cyt *b*<sub>562</sub> and dimeric cyt *cb*<sub>562</sub>**

Oxidized dimeric *E. coli* cyt *b*<sub>562</sub> and dimeric cyt *cb*<sub>562</sub> were prepared by an addition of 75% (v/v) acetic acid to oxidized *E. coli* cyt *b*<sub>562</sub> and cyt *cb*<sub>562</sub> (1 mM), respectively, up to 40% (v/v) in 50 mM sodium phosphate buffer, pH 7.0, at 37 °C. The protein solution was lyophilized to remove acetic acid. The obtained precipitate was dissolved in 50 mM sodium phosphate buffer, pH 7.0, and the obtained protein solution was filtered (pore size, 0.45 µm; Millex, Millipore, Bedford, USA). Dimeric cyt *b*<sub>562</sub> and dimeric cyt *cb*<sub>562</sub> were purified by gel filtration chromatography (HiLoad 26/60 Superdex75, GE healthcare, Buckinghamshire) using the FPLC system (BioLogic DuoFlow 10, Bio-Rad) (flow rate, 1.0 mL/min; monitoring wavelength, 418 nm [cyt *b*<sub>562</sub>] and 415 nm [cyt *cb*<sub>562</sub>]; solvent, 50 mM potassium phosphate buffer, pH 7.0, 4 °C). The fractions containing dimeric cyt *cb*<sub>562</sub> were incubated at 37 °C for 1 h to remove the unstable dimers. After the incubation, dimeric cyt *cb*<sub>562</sub> was purified using the same column and FPLC system described above.

#### **Size exclusion chromatography analysis**

The amount of oxidized dimeric cyt *b*<sub>562</sub> and cyt *cb*<sub>562</sub> in each solution was analyzed by size exclusion chromatography with a Superdex 75 10/300 GL gel column (GE Healthcare) using the FPLC system (BioLogic DuoFlow 10, Bio-Rad) (flow rate, 0.5 mL/min; monitoring wavelength, 418 nm [cyt *b*<sub>562</sub>] and 415 nm [cyt *cb*<sub>562</sub>]; solvent, 50 mM potassium phosphate

buffer, pH 7.0; temperature, 4 °C). The elution curves were fitted with a multi-peak Gaussian fitting procedure (Origin 8, OriginLab Corporation). The percentages of the monomer and dimer were obtained by dividing the area of the peak by the total area of the peaks in the elution curve.

### **Optical absorption and CD measurements**

Absorption spectra were measured with a UV-2450 spectrophotometer (Shimadzu, Kyoto, Japan) using a 1 cm path-length quartz cell at 20 °C. CD spectra were measured with a J-725 CD spectrophotometer (Jasco, Japan) using a 0.1 cm path-length quartz cell at 20 °C. Sample solutions of oxidized monomeric and dimeric cyt *cb*<sub>562</sub> were prepared in 50 mM potassium phosphate buffer, pH 7.0. The heme concentration of the sample solution was adjusted to 10 and 8 μM for the absorption and CD measurement, respectively.

### **Electrochemistry**

CV responses were obtained with an ALS-612DN electrochemical analyzer (BAS Inc., Tokyo, Japan). An Au electrode was used as a working electrode. A Pt wire and Ag/AgCl (3 M NaCl) were used as counter and reference electrode, respectively. Modification of the surface of the Au electrode was performed by the following procedure. The Au electrode was polished with 0.05 μm alumina water slurry, rinsed with pure water to remove residual organic compounds from the electrode surface, and cleaned by electrochemical oxidation/reduction treatment.<sup>5</sup> The Au electrode was dipped in pure water containing 20 mM 2-mercaptoethanol (Wako, Osaka, Japan) for 1 h, and subsequently rinsed with pure water.<sup>6</sup> Cyclic voltammograms of oxidized monomeric and dimeric cyt *cb*<sub>562</sub> (heme unit, 200 μM) were recorded in 50 mM sodium phosphate buffer, pH 7.0, containing 100 mM MgCl<sub>2</sub>. All measurements were performed with a scan rate of 50 mV/s at room temperature, after degassing with a vacuum line and flowing Ar gas for at least 5 min to remove oxygen from the solution. The potentials are reported with respect to the standard hydrogen electrode.

### **Differential scanning calorimetric measurements**

DSC thermograms of oxidized monomeric and dimeric *E. coli* cyt *cb*<sub>562</sub> (heme unit, 100 μM) were measured using VP-DSC (MicroCal, GE Healthcare) at a scan rate of 1 °C/min with 50 mM potassium phosphate buffer, pH 7.0.

### **X-ray crystallography**

Crystallization of dimeric cyt *cb*<sub>562</sub> was carried out at 4 °C using the sitting drop vapor diffusion method. Protein concentration was adjusted to 24 mg/mL in 50 mM Tris-HCl buffer, pH 7.0. The droplet prepared by mixing 1 μL of the protein solution with 1 μL of the reservoir solution was equilibrated. The reservoir solution consisted of 25% PEG MME 350, 6 mM ZnSO<sub>4</sub>, and

750 mM MES buffer, pH 5.5. A crystal was observed in the protein solution after incubation at 4 °C for a week.

Diffraction data were collected at the BL38B1 beamline at SPring-8, Japan, using a Quantum315 detector (ADSC). The crystal was mounted on a cryo-loop without an additional cryoprotectant, and flash-frozen at 100 K in a nitrogen cryo system. The crystal-to-detector distance was 220 mm, and the wavelength was 1.0000 Å. The oscillation angle was 0.5°, and the exposure time was 4 s per frame. The total number of frames was 270. The diffraction data were processed using the program, HKL2000.<sup>7</sup> The preliminary structure was obtained by a molecular replacement method (MOLREP) using the atomic coordinates of the structure of an *E. coli* cyt *cb*<sub>562</sub> monomer (K59W, R98C, and Y101C mutant of cyt *b*<sub>562</sub>; PDB ID: 2BC5) as a starting model. The structure refinement was performed using the program, REFMAC.<sup>8</sup> The molecular model was manually corrected, and water molecules were picked up in the electron density map using the program, COOT. The data collection and refinement statistics are summarized in supplemental Table S1. The cavity size was calculated by the program, VOIDOO, using a probe radius of 1.4 Å.<sup>9</sup>

### **Dynamic light scattering**

DLS experiments were performed with a Zetasizer Nano ZS analyzer (Malvern, Worcestershire, UK). Oxidized monomeric and dimeric cyt *cb*<sub>562</sub> solutions (50 µM, heme unit) in 15 mM MES buffer, pH 5.5, containing 300 µM ZnSO<sub>4</sub>, ZnCl<sub>2</sub>, or Na<sub>2</sub>SO<sub>4</sub>, were incubated at room temperature for 1.5 h, and filtered (pore size, 0.45 µm; Millex, Millipore) before measurements. Each measurement was performed eight times at 25 °C and averaged.

### **Cross-linking of cyt *cb*<sub>562</sub>**

Oxidized dimeric cyt *cb*<sub>562</sub> (heme unit, 200 µM) was reacted with BS3 (25 mM) in 15 mM MES buffer, pH 7.5, containing 1.2 mM ZnSO<sub>4</sub> or Na<sub>2</sub>SO<sub>4</sub>. After incubation of the reaction solution at 25 °C for 30 min, the reaction was quenched by an addition of 1 M Tris-HCl buffer, pH 8.0 (final Tris concentration, 50 mM). The reaction mixture was analyzed by SDS-PAGE and size exclusion chromatography using a Superdex 200 26/600 GL gel column (GE Healthcare) with the FPLC system (AKTAPrime Plus, GE Healthcare, UK) (flow rate, 1.0 mL/min; monitoring wavelength, 280 nm; solvent, 25 mM Tris-HCl buffer, pH 8.0, containing 150 mM NaCl; temperature, 4 °C). The fractions eluted from the column were collected and analysed by MALDI-TOF MS spectroscopy (Autoflex II, Bruker Daltonics, USA) using sinapinic acid as a matrix in linear mode. The buffer of the sample was exchanged to pure water using an Amicon ultrafiltration tube (Millipore, Bedford, USA) before mass measurements.

## 2. Supplementary figures and table

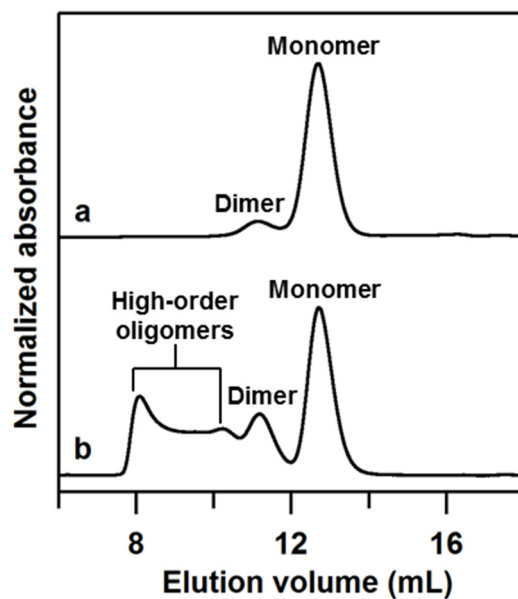

**Fig. S1** Size exclusion chromatograms of oxidized (a) *E. coli* cyt *b*<sub>562</sub> and (b) cyt *cb*<sub>562</sub>. Acetic acid was added to the protein solution up to 40% (v/v), followed by lyophilization and dissolution with 50 mM phosphate buffer, pH 7.0. Monitoring wavelengths were 418 and 415 nm for cyt *b*<sub>562</sub> and cyt *cb*<sub>562</sub>, respectively. The intensities of the curves are normalized by the maximum absorbance.

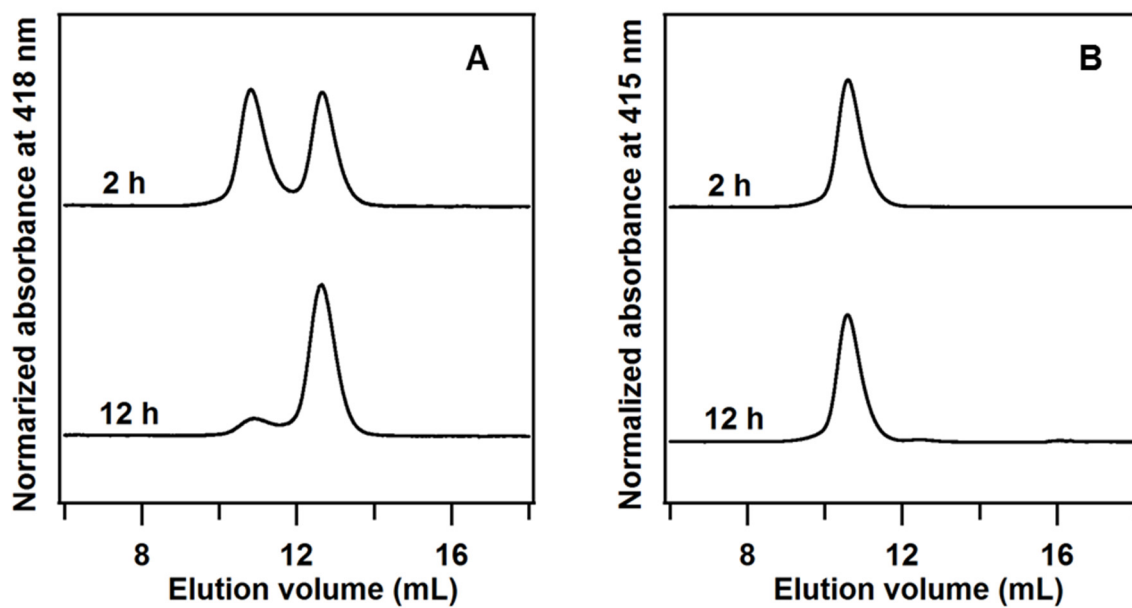

**Fig. S2** Size exclusion chromatograms of the solution containing (A) dimeric cyt *b*<sub>562</sub> and (B) dimeric cyt *cb*<sub>562</sub>. The solution containing the dimer was analyzed after incubation at 4 °C for 2 h and 12 h. The intensities of the curves are normalized by the total area of the curve.

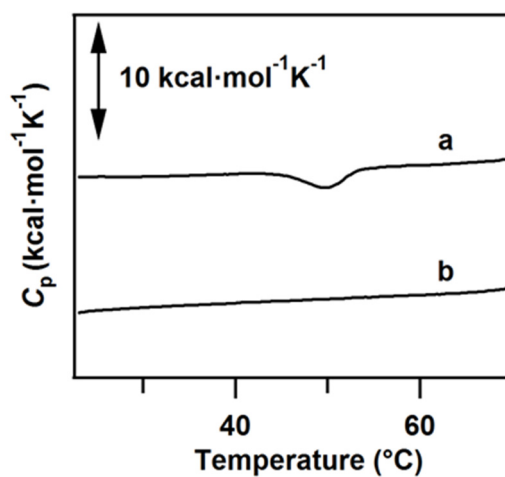

**Fig. S3** Differential scanning calorimetry thermograms of dimeric cyt *cb*<sub>562</sub>. The (a) first and (b) second scans from 20 to 70  $^{\circ}\text{C}$ . Measurement conditions: sample concentration, 100  $\mu\text{M}$  (heme unit); solvent, 50 mM potassium phosphate buffer; pH, 7.0.



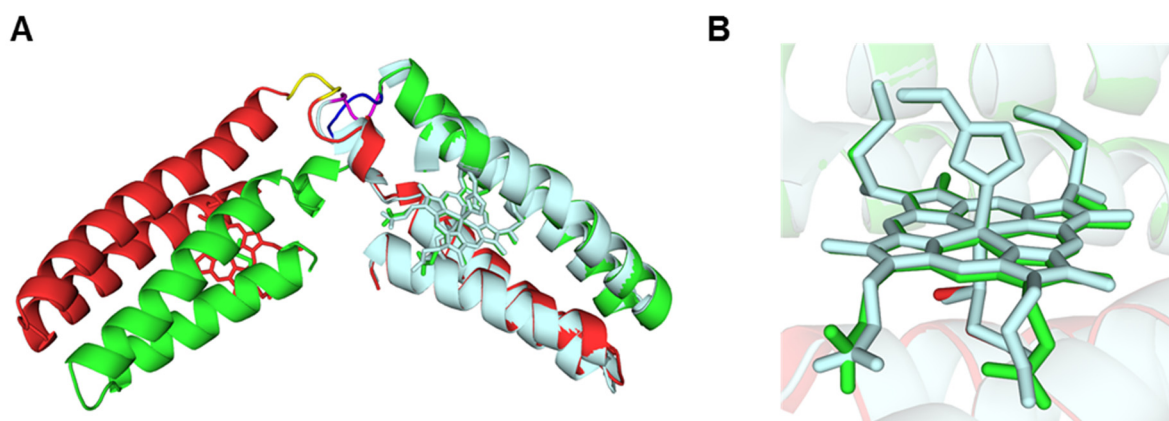

**Fig. S4** Overlapped views of the (A) protein and (B) active site structures of monomeric (PDB ID: 2BC5) (pale-cyan) and dimeric (PDB ID: 5AWI) (green and red) cyt *cb*<sub>562</sub>. Met7, Cys98, Cys101, His102, and the hemes are shown as stick models.

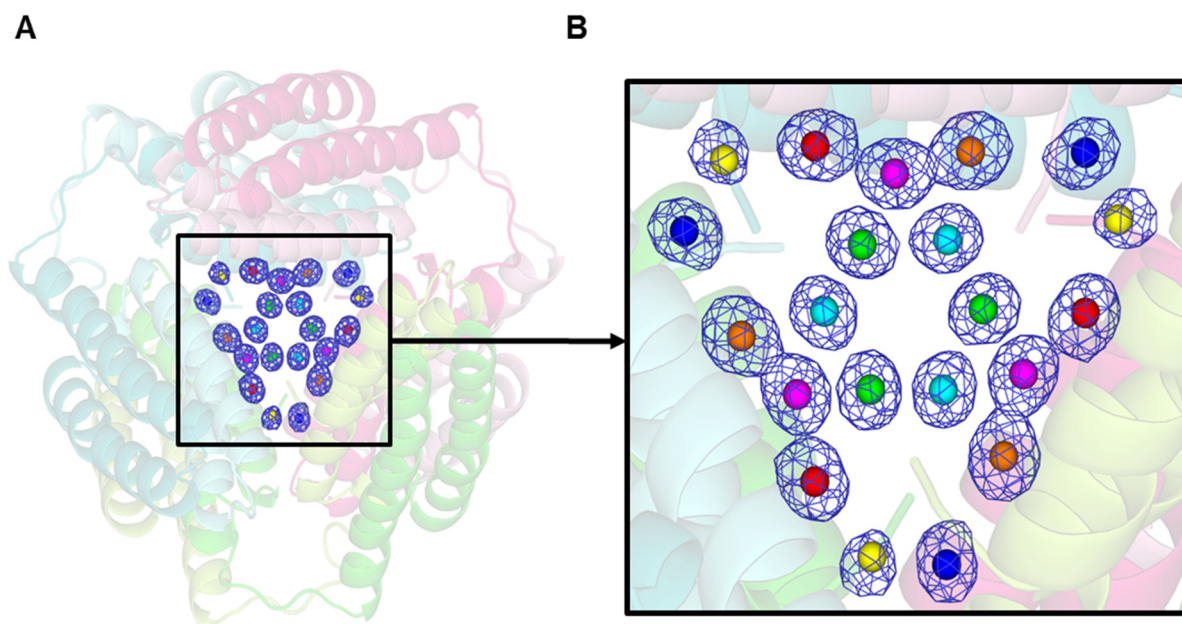

**Fig. S5**  $F_o - F_c$  omit map of the  $Zn^{2+}$  ions in the internal cavity of the cage structure of dimeric cyt *cb*<sub>562</sub> (PDB ID: 5AWI). (A) Overall structure of the cage. (B) An enlarged view of the  $Zn^{2+}$  ions. The  $Zn^{2+}$  ions were omitted from the map calculation. The omit map is shown as blue mesh and contoured at  $3.0 \sigma$ . The three dimers forming the cage structure are shown in combinations of green and light-green, blue-green and cyan, and red and pink, respectively. The  $Zn^{2+}$  ions are shown as green, cyan, magenta, orange, red, yellow, and blue spheres.

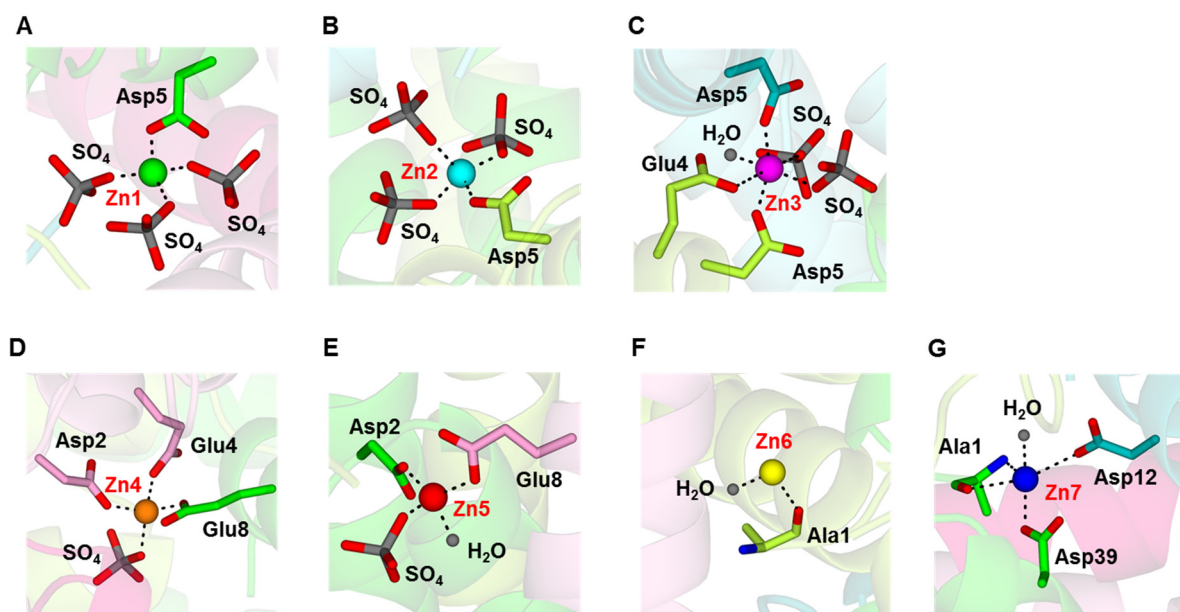

**Fig. S6** Coordination structures of twenty one  $\text{Zn}^{2+}$  and seven  $\text{SO}_4^{2-}$  ions in the internal cavity of the dimeric *cyt cb562* cage structure (PDB ID: 5AWI). Fifteen  $\text{Zn}^{2+}$  ions (Zn1–Zn5) and seven  $\text{SO}_4^{2-}$  ions form a Zn- $\text{SO}_4$  cluster. The other six  $\text{Zn}^{2+}$  ions (Zn6 and Zn7) do not participate in the formation of the Zn- $\text{SO}_4$  cluster. (A) The oxygen atoms of three  $\text{SO}_4^{2-}$  ions (labeled as  $\text{SO}_4$ ) and the side chain of Asp5 of a dimer coordinate to the Zn1 ion. (B) The oxygen atoms of three  $\text{SO}_4^{2-}$  ions and the side chain of Asp5 of a dimer coordinate to the Zn2 ion. (C) The oxygen atoms of two  $\text{SO}_4^{2-}$  ions, the side chain of Glu4, the side chains of two Asp5, and one water molecule coordinate to the Zn3 ion. Glu4 and one Asp5 belong to the same dimer, whereas the other Asp5 originates from another dimer. (D) The oxygen atom of one  $\text{SO}_4^{2-}$  ion and the side chains of Asp2, Glu4, and Glu8 coordinate to the Zn4 ion. Asp2 and Glu4 belong to the same dimer, whereas Glu8 belongs to another dimer. (E) The oxygen atoms of one  $\text{SO}_4^{2-}$  ion, the side chains of Asp2 and Glu8, and one water molecule coordinate to the Zn5 ion. Asp2 and Glu8 belong to different dimers. (F) The carbonyl oxygen atom of Ala1 and a water molecule coordinate to the Zn6 ion, whereas other water molecules may coordinate to the Zn6 ion. (G) The amino nitrogen and carbonyl oxygen atoms of Ala1, the side chain oxygen atoms of Asp12 and Asp39, and one water molecule coordinate to the Zn7 ion. Ala1 and Asp39 belong to the same dimer, whereas Asp12 belongs to another dimer. The  $\text{SO}_4^{2-}$  ions, Ala1, and the side chains of Asp2, Glu4, Asp5, Glu8, Asp12, and Asp39 are shown as stick models. The oxygen, nitrogen, and sulfur atoms of the coordinating amino acids are shown in red, blue, and gray, respectively. The coordinating water molecules are shown as small grey spheres. The coordination bonds ( $< 2.65 \text{ \AA}$ ) between  $\text{Zn}^{2+}$  ions and their ligands are shown as black dash lines.

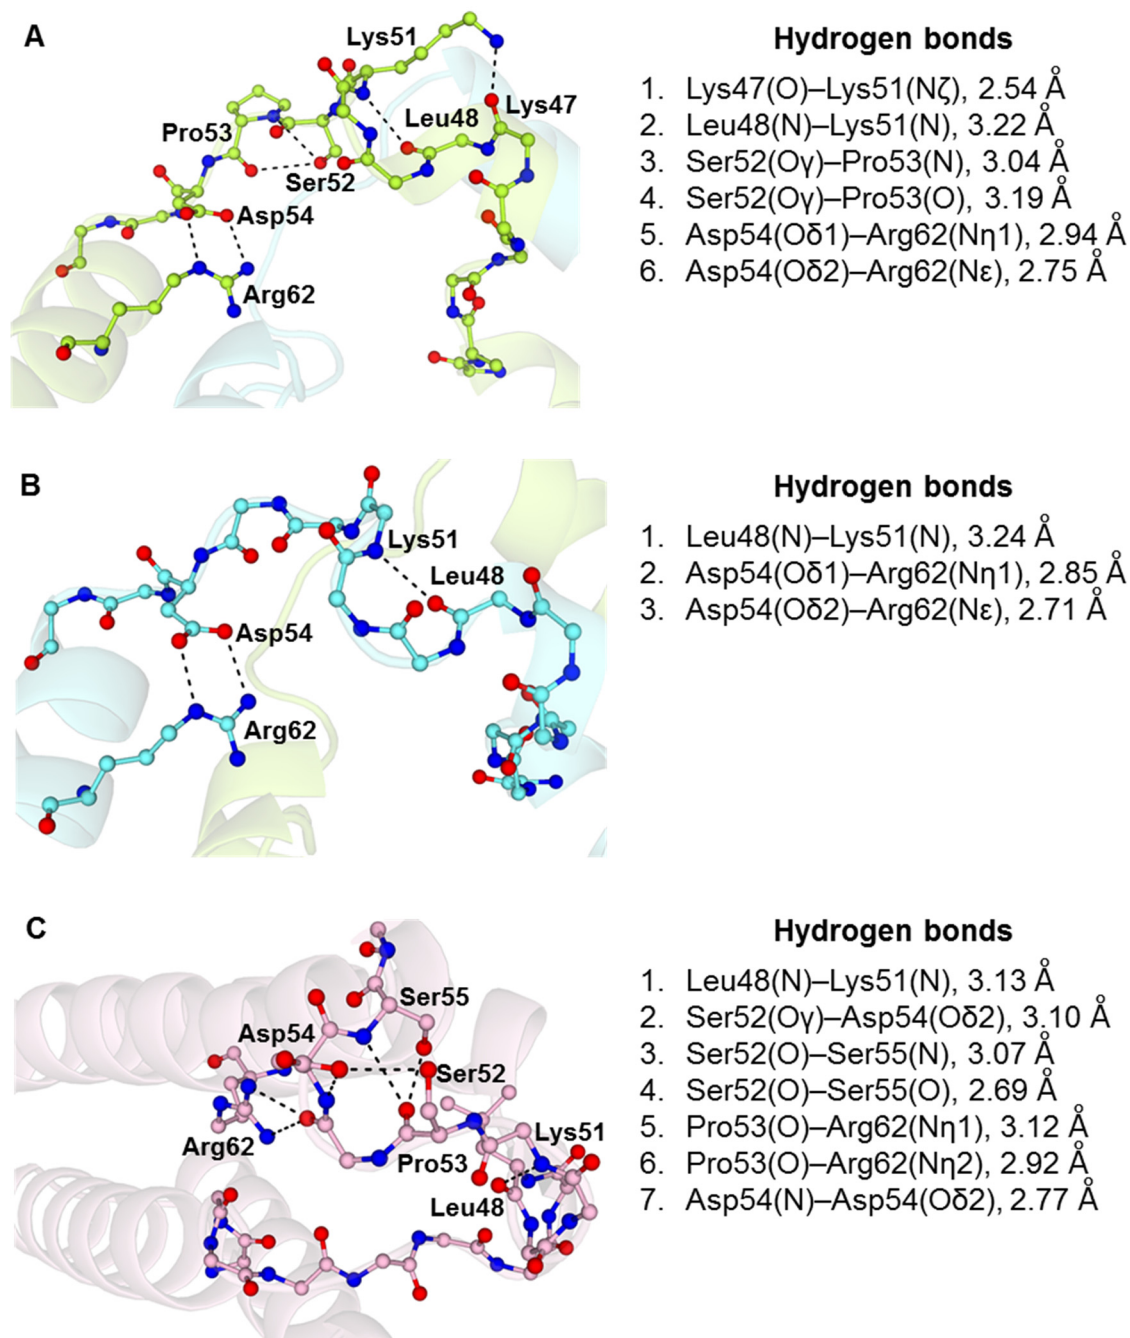

**Fig. S7** Schematic views of the hydrogen bonds ( $< 3.5$  Å) at the hinge loop (Lys51–Asp54) of (A, B) the dimeric *cyt cb562* protomers (PDB: 5AWI) and (C) monomeric *cyt b562* (PDB: 256B). The hydrogen bonds are depicted in black dash lines. The *cyt b562* monomer structure was used for the comparison, since the W59 residue of the K59W mutant *cyt cb562* interacted with the hinge loop. The protomers of the dimers are depicted in light-green and cyan, respectively. The main chain of the residues in the loop between helices 2 and 3, and the side chains of the residues forming the hydrogen bonds are shown as ball-and-stick models. The nitrogen and oxygen atoms are depicted in blue and red, respectively.

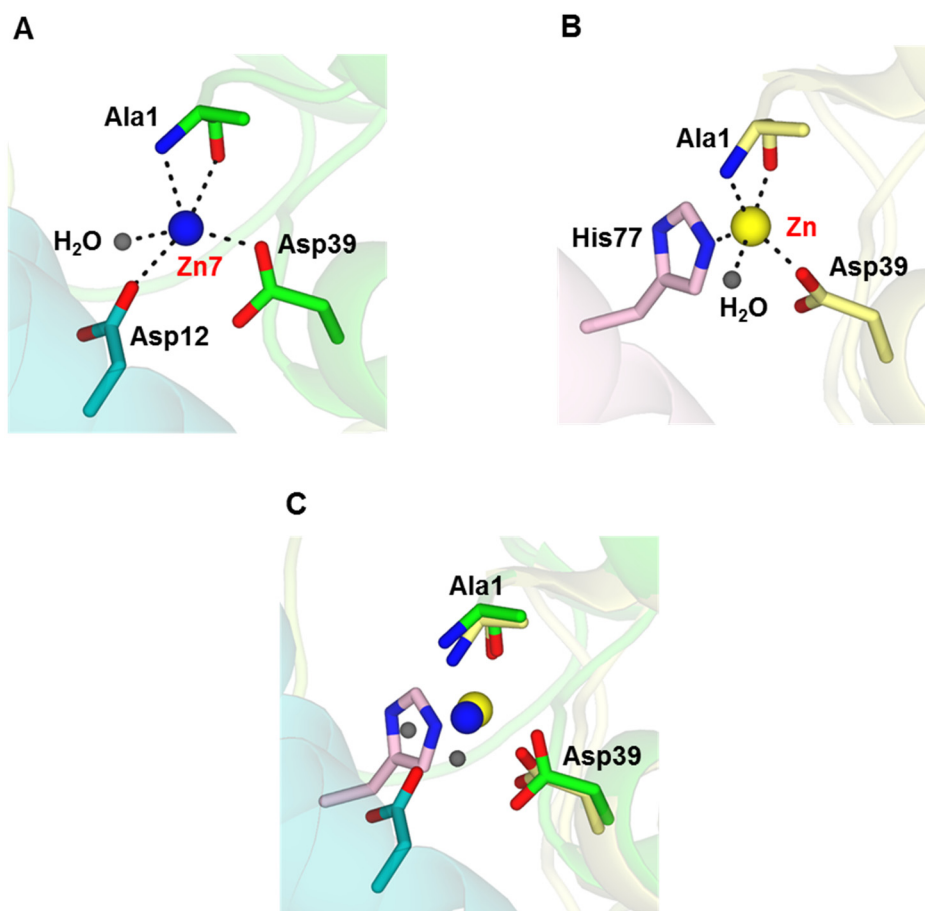

**Fig. S8** Schematic views of the Ala1 and Asp39 containing Zn binding sites of (A) domain-swapped *cyt cb562* dimer cage (PDB ID: 5AWI) and (B) *cyt cb562* surface mutant cage (PDB ID: 3M4B), and (C) their overlapped view. The coordination bonds ( $< 2.65 \text{ \AA}$ ) between the  $\text{Zn}^{2+}$  ions and their ligands are shown as black dash lines. Main and side chains of Ala1 and side chains of Asp12, Asp39, and His77 are shown as stick models. The  $\text{Zn}^{2+}$  ions are shown as blue and yellow spheres for the domain-swapped *cyt cb562* dimer cage and *cyt cb562* surface mutant cage, respectively. The oxygen and nitrogen atoms of the coordinating amino acids are shown in red and blue, respectively. The coordinating water molecules are shown as small grey spheres.

**Table S1** Crystallographic statistics of data collection and structure refinement of dimeric cyt *cb562* (PDB ID: 5AWI).

| Data collection                                            |                        |
|------------------------------------------------------------|------------------------|
| X-ray source                                               | SPring-8 (BL38B1)      |
| Wavelength (Å)                                             | 1.0000                 |
| Space group                                                | <i>P2<sub>1</sub>3</i> |
| Unit cell parameters<br><i>a</i> , <i>b</i> , <i>c</i> (Å) | 94.6, 94.6, 94.6       |
| Resolution (Å)                                             | 20.0–1.85 (1.88–1.85)  |
| Number of unique reflections                               | 24682 (1241)           |
| $R_{\text{merge}}^a$                                       | 0.061 (0.594)          |
| Completeness (%)                                           | 100.0 (100.0)          |
| $\langle I/\sigma(I) \rangle$                              | 69.0 (6.2)             |
| Redundancy                                                 | 16.4 (16.6)            |
| Refinement                                                 |                        |
| Resolution (Å)                                             | 19.3-1.85 (1.90-1.85)  |
| Number of reflections                                      | 23154 (1774)           |
| $R_{\text{work}}^b$                                        | 0.180 (0.268)          |
| $R_{\text{free}}^b$                                        | 0.205 (0.391)          |
| Completeness (%)                                           | 100.0 (99.9)           |
| Number of atoms in an asymmetric unit                      |                        |
| Protein                                                    | 1630                   |
| Water                                                      | 61                     |
| Heme                                                       | 86                     |
| Average <i>B</i> factors (Å <sup>2</sup> )                 |                        |
| Protein                                                    | 37.5                   |
| Water                                                      | 32.4                   |
| Heme                                                       | 25.3                   |
| Ramachandran plot (%)                                      |                        |
| Favored                                                    | 99.5                   |
| Allowed                                                    | 0.5                    |
| Outlier                                                    | 0.0                    |

Statistics for the highest-resolution shell are given in parentheses.

$$^a R_{\text{merge}} = \frac{\sum_{\text{hkl}} |I - \langle I \rangle|}{(\sum_{\text{hkl}} |I|)^{-1}}$$

$^b R_{\text{work}} = \frac{\sum_{\text{hkl}} ||F_{\text{obs}}| - k|F_{\text{calc}}||}{(\sum_{\text{hkl}} |F_{\text{obs}}|)^{-1}}$ , *k*: scaling factor.  $R_{\text{free}}$  was computed identically, except where all reflections belong to a test set of 5 % of randomly selected data.

### 3. Supplementary references

1. J. Faraone-Mennella, F. A. Tezcan, H. B. Gray and J. R. Winkler, *Biochemistry*, 2006, **45**, 10504.
2. E. Arslan, H. Schulz, R. Zufferey, P. Künzler and L. Thöny-Meyer, *Biochem. Biophys. Res. Commun.*, 1998, **251**, 744.
3. E. Itagaki and L. P. Hager, *J. Biol. Chem.*, 1966, **241**, 3687.
4. E. A. Berry and B. L. Trumpower, *Anal. Biochem.*, 1987, **161**, 1.
5. G. Battistuzzi, M. Borsari, M. Sola and F. Francia, *Biochemistry*, 1997, **36**, 16247.
6. M. Yoshida, K. Igarashi, M. Wada, S. Kaneko, N. Suzuki, H. Matsumura, N. Nakamura, H. Ohno and M. Samejima, *Appl. Environ. Microbiol.*, 2005, **71**, 4548.
7. Z. Otwinowski and W. Minor, *Methods Enzymol.*, 1997, **276**, 307.
8. G. N. Murshudov, P. Skubak, A. A. Lebedev, N. S. Pannu, R. A. Steiner, R. A. Nicholls, M. D. Winn, F. Long and A. A. Vagin, *Acta. Crystallogr., Sect. D: Biol. Crystallogr.*, 2011, **67**, 355.
9. G. J. Kleywegt and T. A. Jones, *Acta. Crystallogr., Sect. D: Biol. Crystallogr.*, 1994, **50**, 178.
